# Supplementary material
Source: PubMed Central journal article supplement (PMC10777869)
Supplement: NIHMS1953535-supplement-Structure_and_Molecular_SI.pdf [file NIHMS1953535-supplement-Structure_and_Molecular_SI.pdf]

## Supplementary Information

### **Structure and Molecular Mechanism of Signaling for the Glucagon-like Peptide-1 Receptor Bound to Gs Protein and Exendin-P5 Biased Agonist**

Bo Li,<sup>†</sup> Krystyna Maruszko,<sup>†</sup> Soo-Kyung Kim,<sup>†</sup> Moon Young Yang, Amy-Doan P Vo, William A. Goddard III\*

Division of Chemistry and Chemical Engineering and Materials Process and Simulation Center, California Institute of Technology, Pasadena, CA 91125.

<sup>†</sup>These authors contributed equally.

\*Corresponding author, e-mail: [wag@caltech.edu](mailto:wag@caltech.edu)

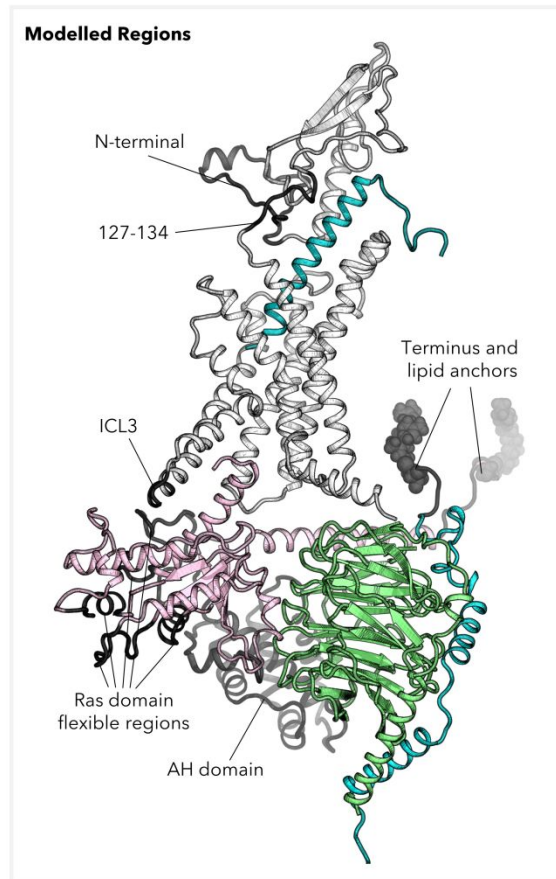

**Figure S1.** Depiction of remodeled structures from our present simulations (colored in black). A detailed outline of the computationally added structures is provided in the Method Section.

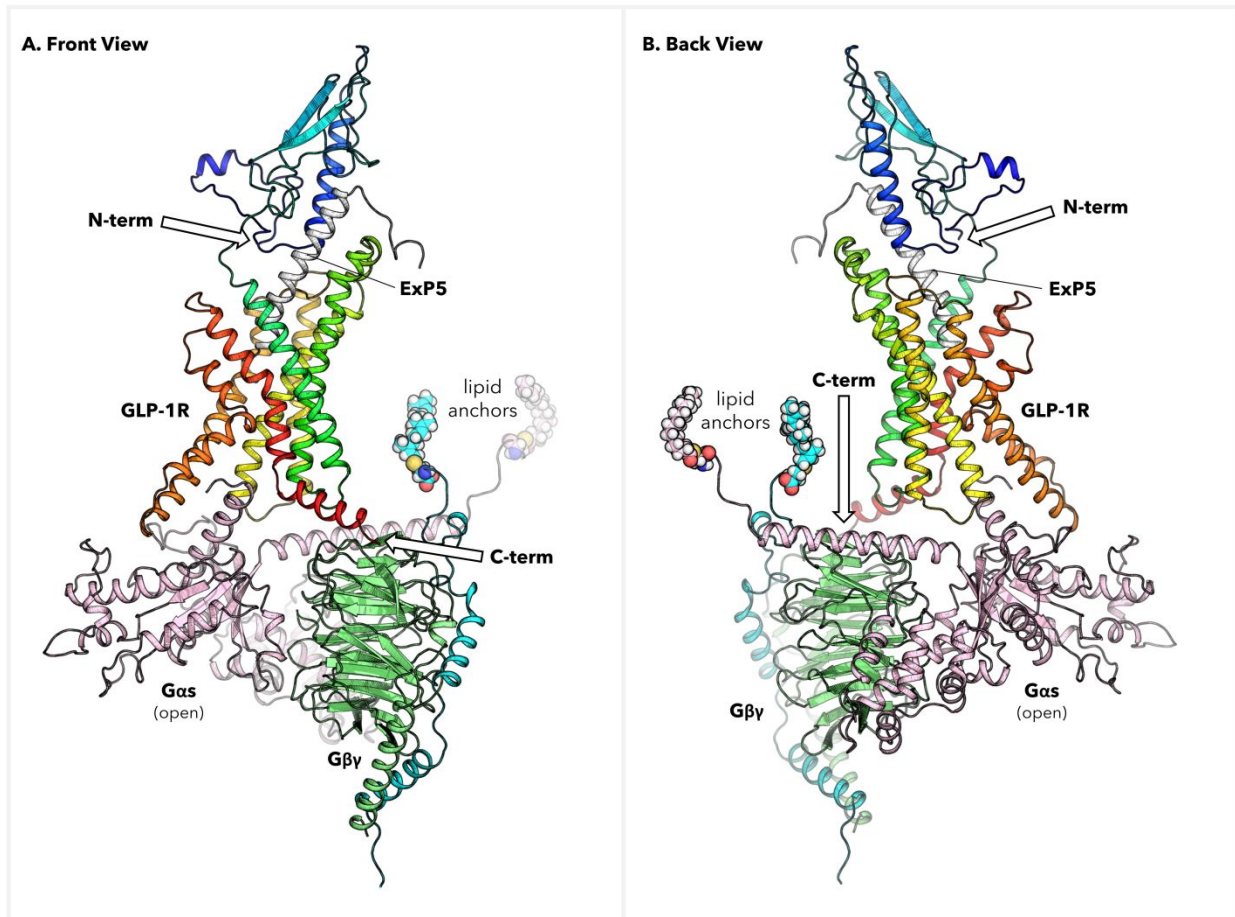

**Figure S2.** Structure overview of the ExP5 biased agonist-bound GLP-1R–Gs signaling complex. (A-B) Front and back views with GLP-1R colored by residue number (blue: N-terminus, red: C-terminus).

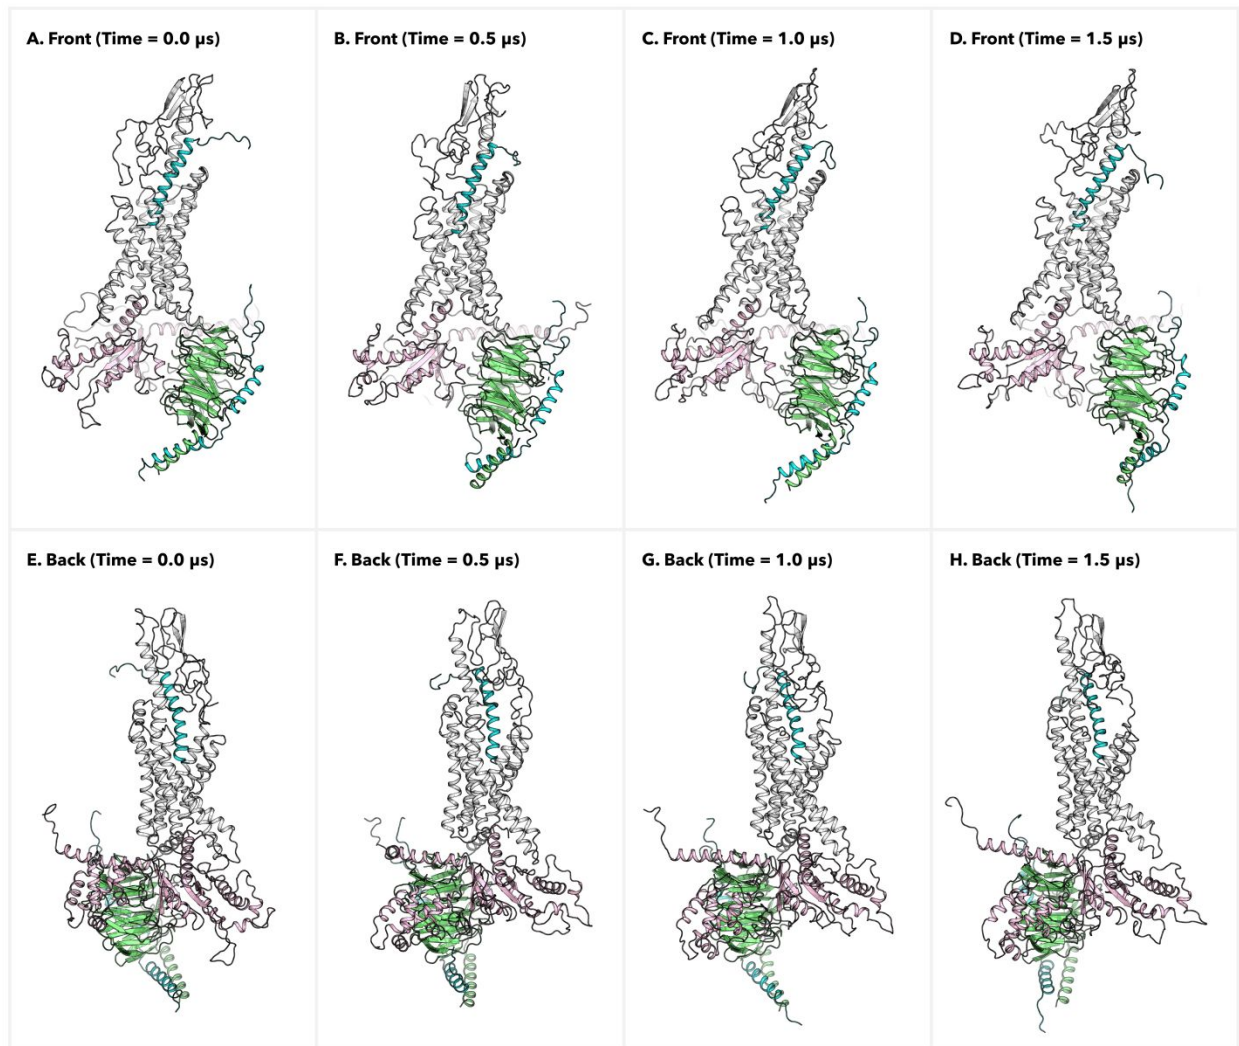

**Figure S3.** Structural changes of the ExP5–GLP-1R–Gs signaling complex at 0.0, 0.5, 1.0, 1.5  $\mu$ s of our trajectory. (A–D) Front view. (E–H) Back view. While the overall complexation mode is stable, multiple unstructured regions, including those in GLP-1R NTD, ExP5 C-terminus and the heterotrimeric Gs protein, undergo disordered movements. The AH domain of G $\alpha$ s relaxes to a slightly more downward position in the first 0.5  $\mu$ s and remains stable thereafter. Other major movements are discussed in detail in the main text.

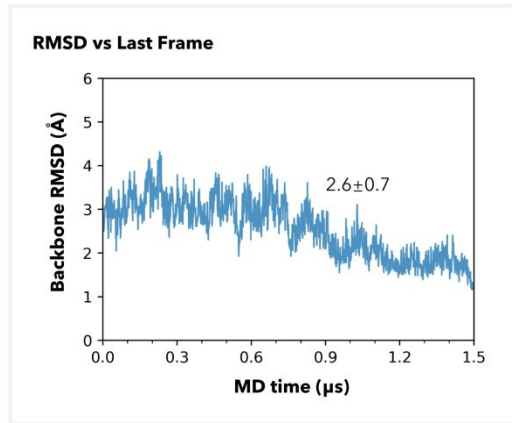

**Figure S4.** Backbone RMSD plot for the MD trajectory (vs last frame) supporting the structural integrity of the simulated ExP5-bound GLP-1R-Gs complex.

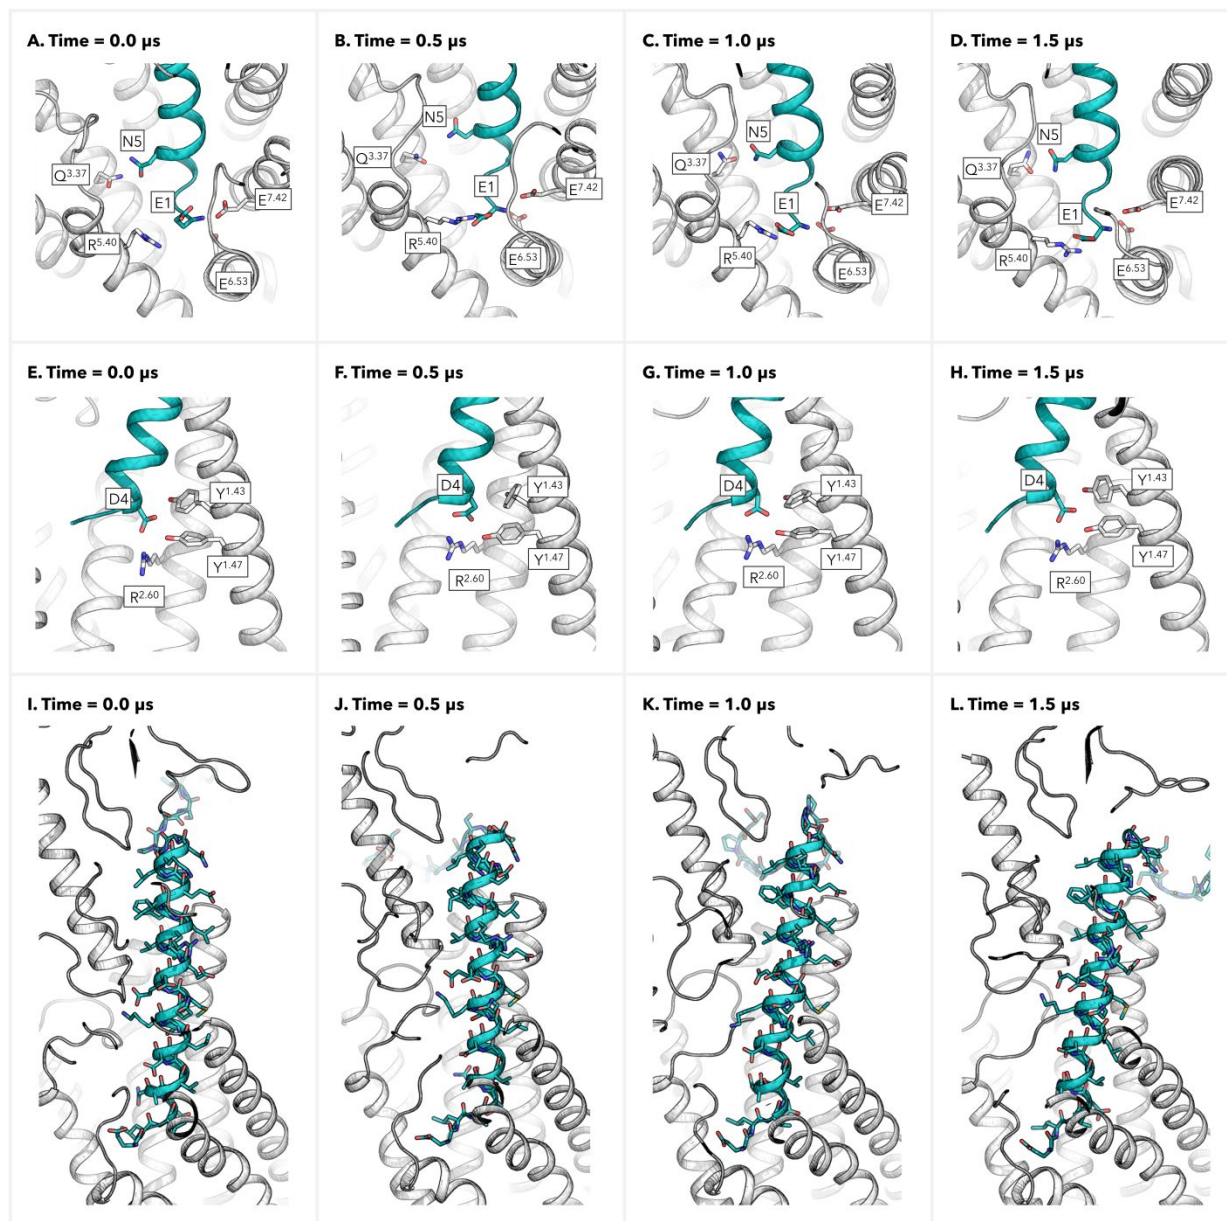

**Figure S5.** ExP5 binding interactions with TMD throughout our trajectory. (A-D) Front view on E1<sup>Exp5</sup>-based SB network and N5<sup>Exp5</sup>-Q<sup>3.37</sup> H-bond, suggesting that the E1<sup>Exp5</sup> interaction hub is established early in the trajectory and remains stable. (E-H) Side view on the Y<sup>1.43</sup>-D4<sup>Exp5</sup>-R<sup>2.60</sup>-Y<sup>1.47</sup> HB network involving multiple synergistic anchors. (I-L) Full depiction of ExP5 atomistic motions throughout the MD simulation, which shows that the  $\alpha$ -helical body of ExP5 maintains a stable general binding mode to GLP-1R, while the C-terminal (shown on the top) is disordered.

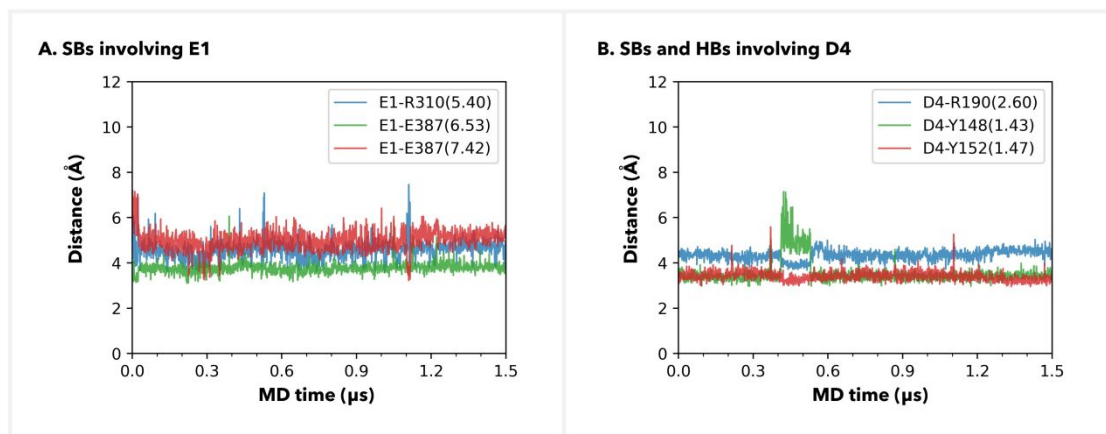

**Figure S6.** Simulated salt-bridge and H-bond distances for ExP5 binding interactions involving (A) E1<sup>Exp5</sup> and (B) D4<sup>Exp5</sup>. See **Fig. 2** for depictions of the interactions.

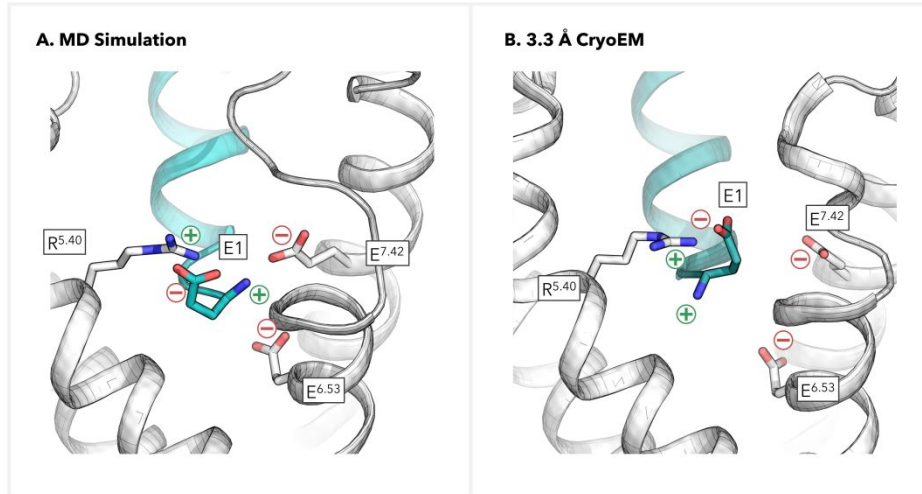

**Figure S7.** N-terminal E1<sup>Exp5</sup> interactions in (A) our current MD simulation and (B) the original cryoEM structure referenced herein (PDB code: 6B3J). The ionic engagements of E1<sup>Exp5</sup> by E<sup>6.53</sup> and E<sup>7.42</sup> were not captured in the cryoEM structure.



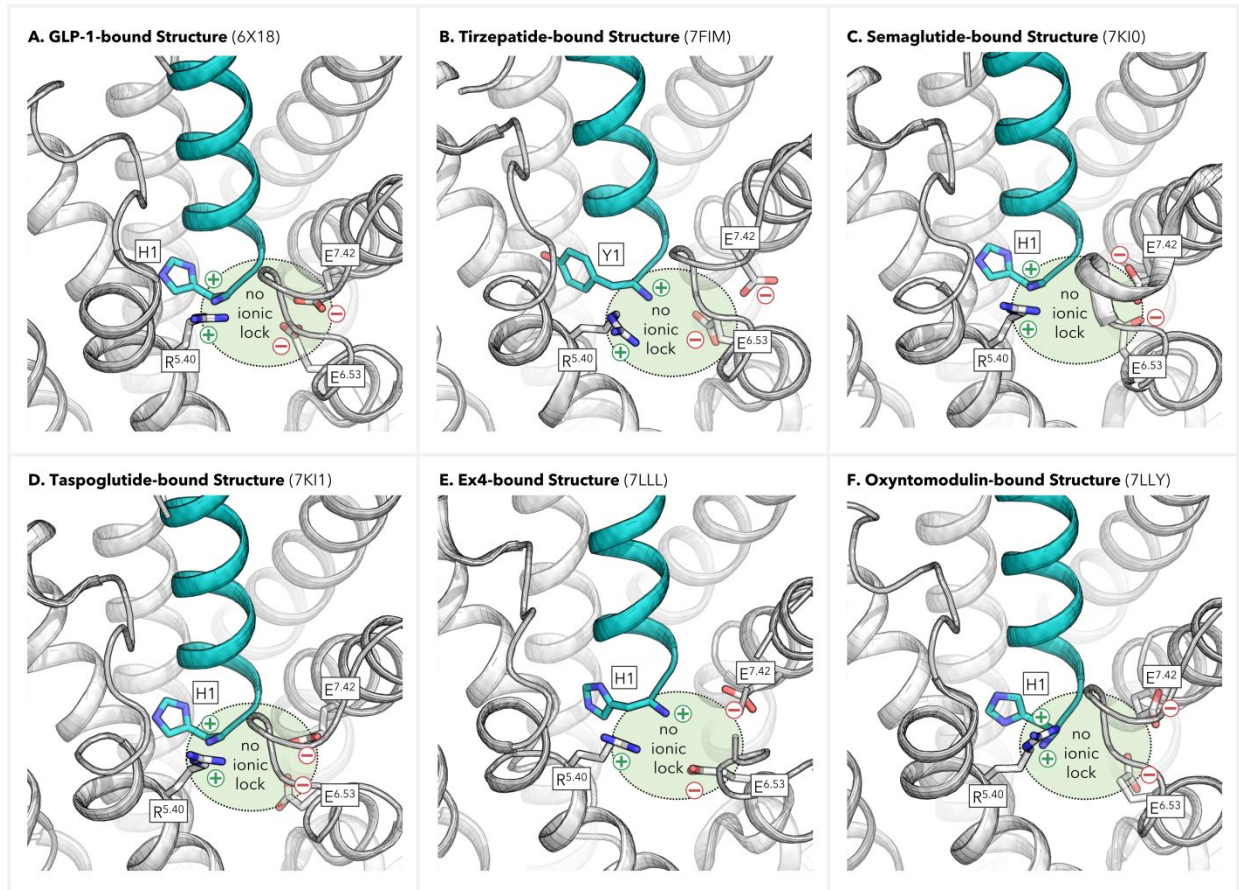

**Figure S8.** Binding interactions between the N-termini of peptide agonists with the GLP-1R–Gs signaling complex, showcasing the lack of the E1<sup>Exp5</sup> ionic network. PDB codes are provided in parentheses.

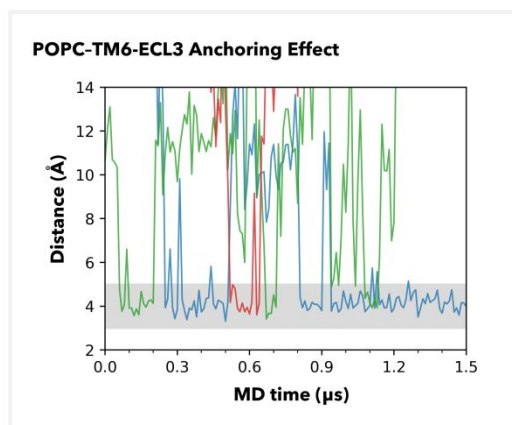

**Figure S9.** Simulated distances for the anchoring of POPC at the TM6–ECL3 intersection. Three POPC molecules have been observed to show significant retention time (at least 0.1  $\mu\text{s}$ ). For each individual POPC, we computed  $\min[N^{\text{POPC}}\text{--O}(\text{A}^{6.57}), N^{\text{POPC}}\text{--O}(\text{F}^{6.58})]$  over the entire trajectory to measure the shortest distance between the positively charged N atom of POPC and the backbone O atom of either  $\text{A}^{6.57}$  or  $\text{F}^{6.58}$ , which are presented in the current plot.

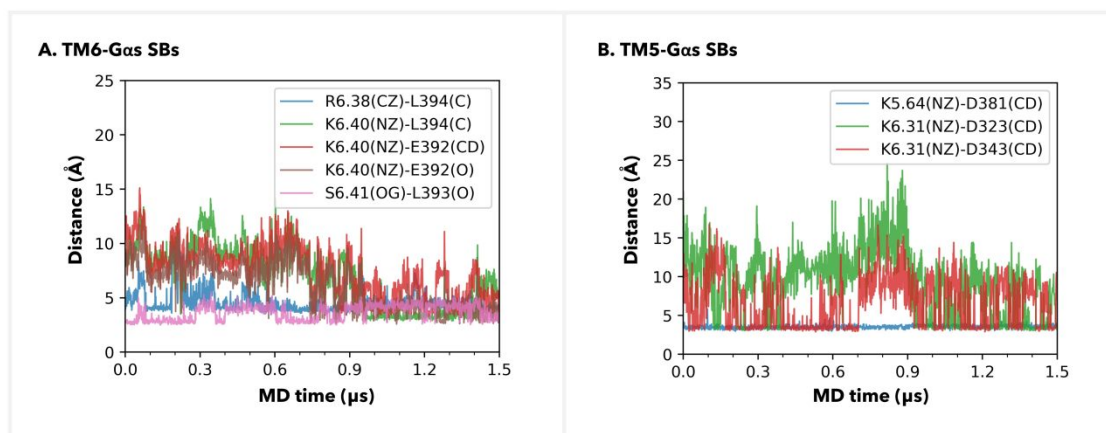

**Figure S10.** Simulated distances for several possible SBs at the (A) TM6-G $\alpha$ s and (B) TM5-G $\alpha$ s interfaces. See Fig. 4 for depictions of these interactions.

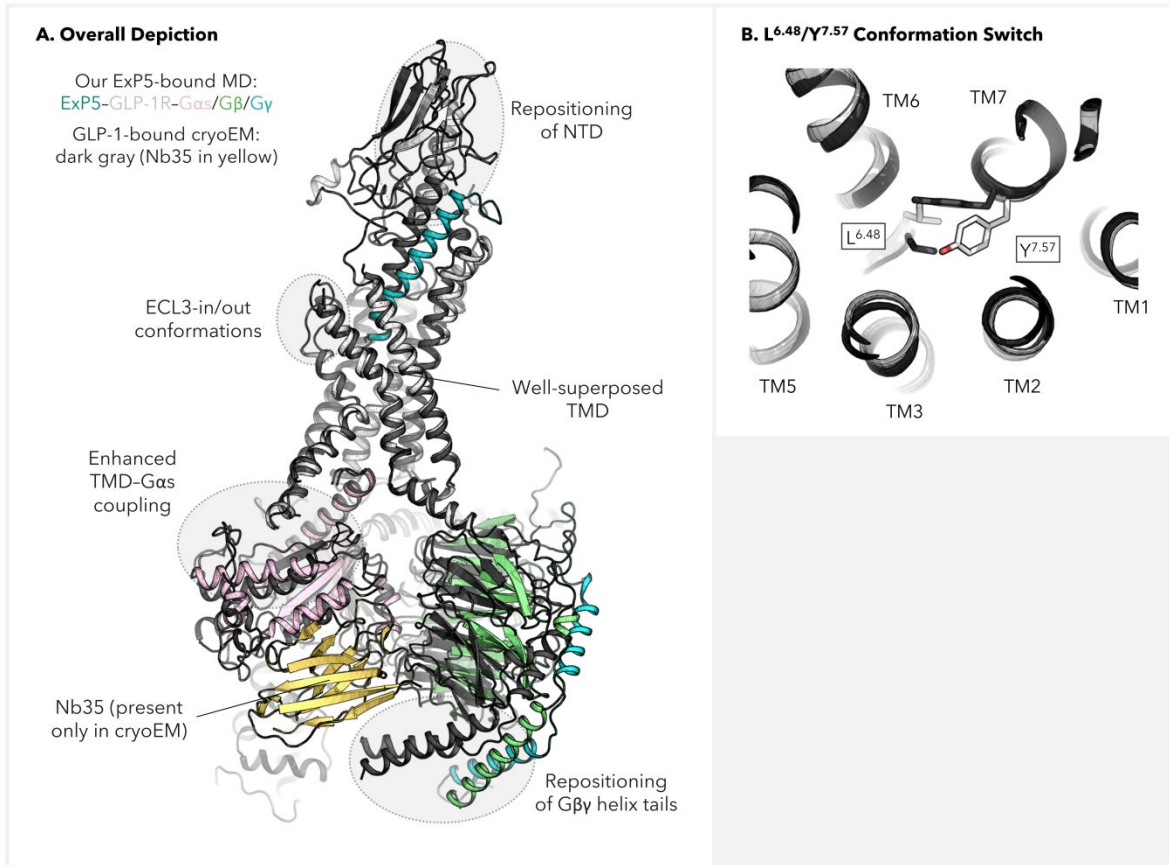

**Figure S11.** Superimposition of our simulated ExP5-bound GLP-1R–Gs signaling complex with a high-resolution GLP-1-bound model (PDB code: 6X18). (A) Overall depiction. (B) L<sup>6.48</sup>/Y<sup>7.57</sup> conformation switch.
